# Supplementary material
Source: Springer Nature journal article supplement (https://www.springermedizin.de/resource/supplementary/12874_2003_48_MOESM1_ESM.pdf/9433656)

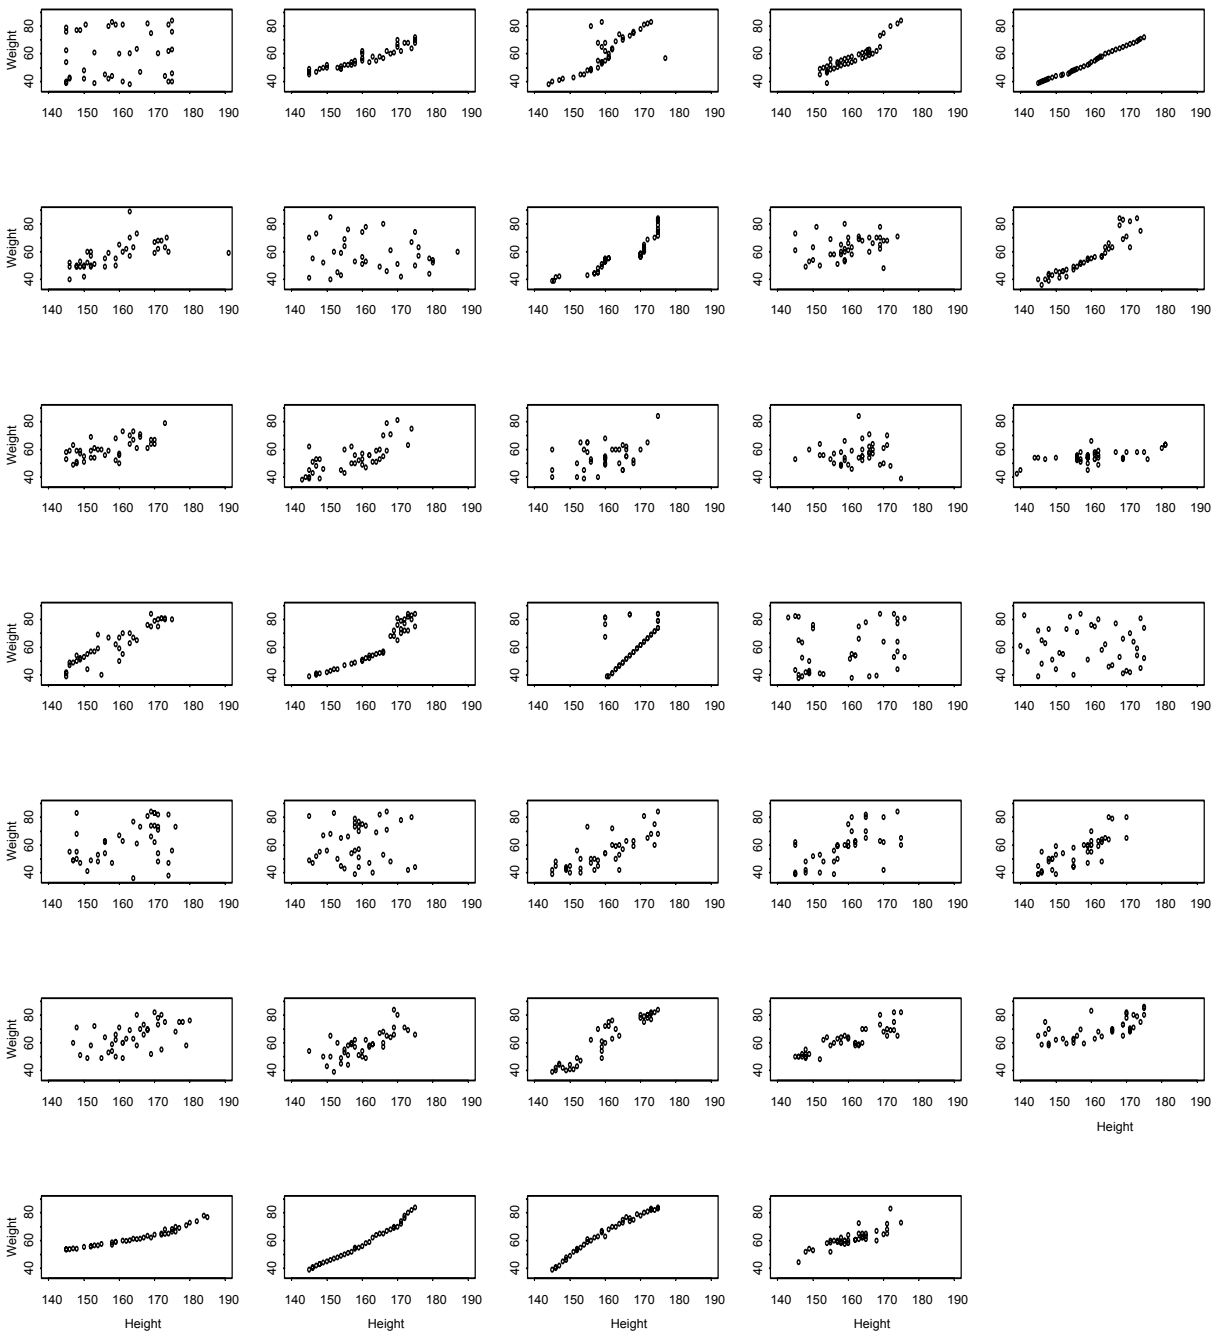

Supplement: MOESM1 [file 9433656]
